# Supplementary material for: Prevalence and Molecular Characterisation of Blastocystis sp. Infecting Free-Ranging Primates in Colombia
Source: MDPI journal article supplement (doi:10.3390/pathogens12040569), 2023-04-06
Supplement: s1 [file s1]

**Supplementary Table S1.** Material used for strain assignment according to *Blastocystis* sp. 18S polymorphisms.

| Subtype code | Host                                  | Accession number | Country  |
|--------------|---------------------------------------|------------------|----------|
| ST1_USA      | Human                                 | U51151           | USA      |
| ST1_Thai     | Human                                 | AY618266         | Thailand |
| ST2_Jap1     | Human                                 | AB070987         | Japan    |
| ST2_Jap2     | <i>Macaca fuscata</i>                 | AB070997         | Japan    |
| ST3_Sen      | Human                                 | JX132219         | Senegal  |
| ST3_Jap      | Cattle                                | AB107965         | Japan    |
| ST4_Ger      | Human                                 | AY244620         | Germany  |
| ST4_Jap      | Rat                                   | AB071000         | Japan    |
| ST5_Jap      | Cattle                                | AB107966         | Japan    |
| ST5_Ger      | Pig                                   | MK801369         | Germany  |
| ST6          | Human                                 | AB091236         | Unknown  |
| ST6_Bra      | Chicken                               | MW538478         | Brazil   |
| ST7_Chi      | Human                                 | DQ366343         | China    |
| ST7_Bra      | Chicken                               | MW538475         | Brazil   |
| ST8_Jap1     | <i>Varecia variegata</i> <sup>φ</sup> | AB107970         | Japan    |
| ST8_Jap2     | Pheasant                              | AB107971         | Japan    |
| 512*a        | <i>Alouatta seniculus</i> •           | OP328758         | Colombia |
| 603*a        | <i>Alouatta seniculus</i> •           | OP328759         | Colombia |
| 615*a        | <i>Alouatta seniculus</i> •           | OP328760         | Colombia |
| 616*a        | <i>Alouatta seniculus</i> •           | OP328761         | Colombia |
| 61*a         | <i>Alouatta seniculus</i> •           | OP328762         | Colombia |
| 63*a         | <i>Alouatta seniculus</i> •           | OP328763         | Colombia |
| 79*a         | <i>Alouatta seniculus</i> •           | OP328764         | Colombia |
| 81*a         | <i>Alouatta seniculus</i> •           | OP328765         | Colombia |
| 548*b        | <i>Alouatta seniculus</i> •           | OP329405         | Colombia |
| 603*b        | <i>Alouatta seniculus</i> •           | OP329406         | Colombia |
| 608*b        | <i>Alouatta seniculus</i> •           | OP329407         | Colombia |
| 615*b        | <i>Alouatta seniculus</i> •           | OP329408         | Colombia |
| 616*b        | <i>Alouatta seniculus</i> •           | OP329410         | Colombia |
| 617*b        | <i>Alouatta seniculus</i> •           | OP329409         | Colombia |
| 61*b         | <i>Alouatta seniculus</i> •           | OP329411         | Colombia |
| 63*b         | <i>Alouatta seniculus</i> •           | OP329412         | Colombia |
| 79*b         | <i>Alouatta seniculus</i> •           | OP329413         | Colombia |
| 81*b         | <i>Alouatta seniculus</i> •           | OP329414         | Colombia |
| ST9_Jap      | Human                                 | AF408425         | Japan    |
| ST9_Den      | Human                                 | KC138681         | Denmark  |
| ST10_USA     | Cattle                                | MT898456         | USA      |
| ST10_Lib     | Dromedary                             | KC148207         | Libya    |
| ST11_USA     | Elephant                              | MT898454         | USA      |
| ST12_unk     | Wallaby                               | EU427515         | Unknown  |
| ST13_UK      | Mousedeer                             | KC148209         | UK       |
| ST14_USA1    | Cattle                                | MT898458         | USA      |
| ST14_USA2    | Cattle                                | MT898459         | USA      |

|                              |                     |          |          |
|------------------------------|---------------------|----------|----------|
| ST15_UK                      | Gibbon <sup>φ</sup> | KC148211 | UK       |
| ST16_unk1                    | Red kangaroo        | EU427512 | Unknown  |
| ST16_unk2                    | Red kangaroo        | EU427514 | Unknown  |
| ST17_Lib                     | Gundi               | KC148208 | Libya    |
| ST21_USA                     | White-tailed deer   | MW887929 | USA      |
| ST23_USA                     | Cattle              | MW887931 | USA      |
| ST24_USA                     | White-tailed deer   | MW887928 | USA      |
| ST25_USA                     | Cattle              | MW887933 | USA      |
| ST26_USA                     | Cattle              | MW887932 | USA      |
| ST27_Bra                     | Indian peafowl      | MW887934 | Brazil   |
| ST28_Bra                     | Indian peafowl      | MW887935 | Brazil   |
| ST29_Bra                     | Chicken             | MW538473 | Brazil   |
| ST30_USA                     | White-tailed deer   | MZ267676 | USA      |
| ST31_USA                     | White-tailed deer   | MZ267677 | USA      |
| ST32_Col                     | Goat                | MZ265403 | Colombia |
| ST33_Col1                    | Horse               | ON932569 | Colombia |
| ST33_Col2                    | Horse               | ON932570 | Colombia |
| ST34_Col                     | Horse               | ON932571 | Colombia |
| ST35_Bra                     | Human               | OP720870 | Brazil   |
| ST36_Mex                     | Bat                 | OP720871 | Mexico   |
| ST37_Mex                     | Heteromyid          | OP720872 | Mexico   |
| ST38_UK                      | Water volpe         | OP720869 | UK       |
| <i>Proteromonas lacertae</i> |                     | U37108   | USA      |

\*samples analysed in the present study; a: primers Blast 505-532 - Blast 998-1017 from Santin et al. 2011[26]; b: primers BhRDr-RD5 from Scicluna et al. 2006 [8].

• Free-ranging, <sup>φ</sup> Captive.
