# Supplementary figures and images for: Prevalence and Molecular Characterisation of Blastocystis sp. Infecting Free-Ranging Primates in Colombia
Source: MDPI journal article supplement (doi:10.3390/pathogens12040569), 2023-04-06

Tree scale: 0.1

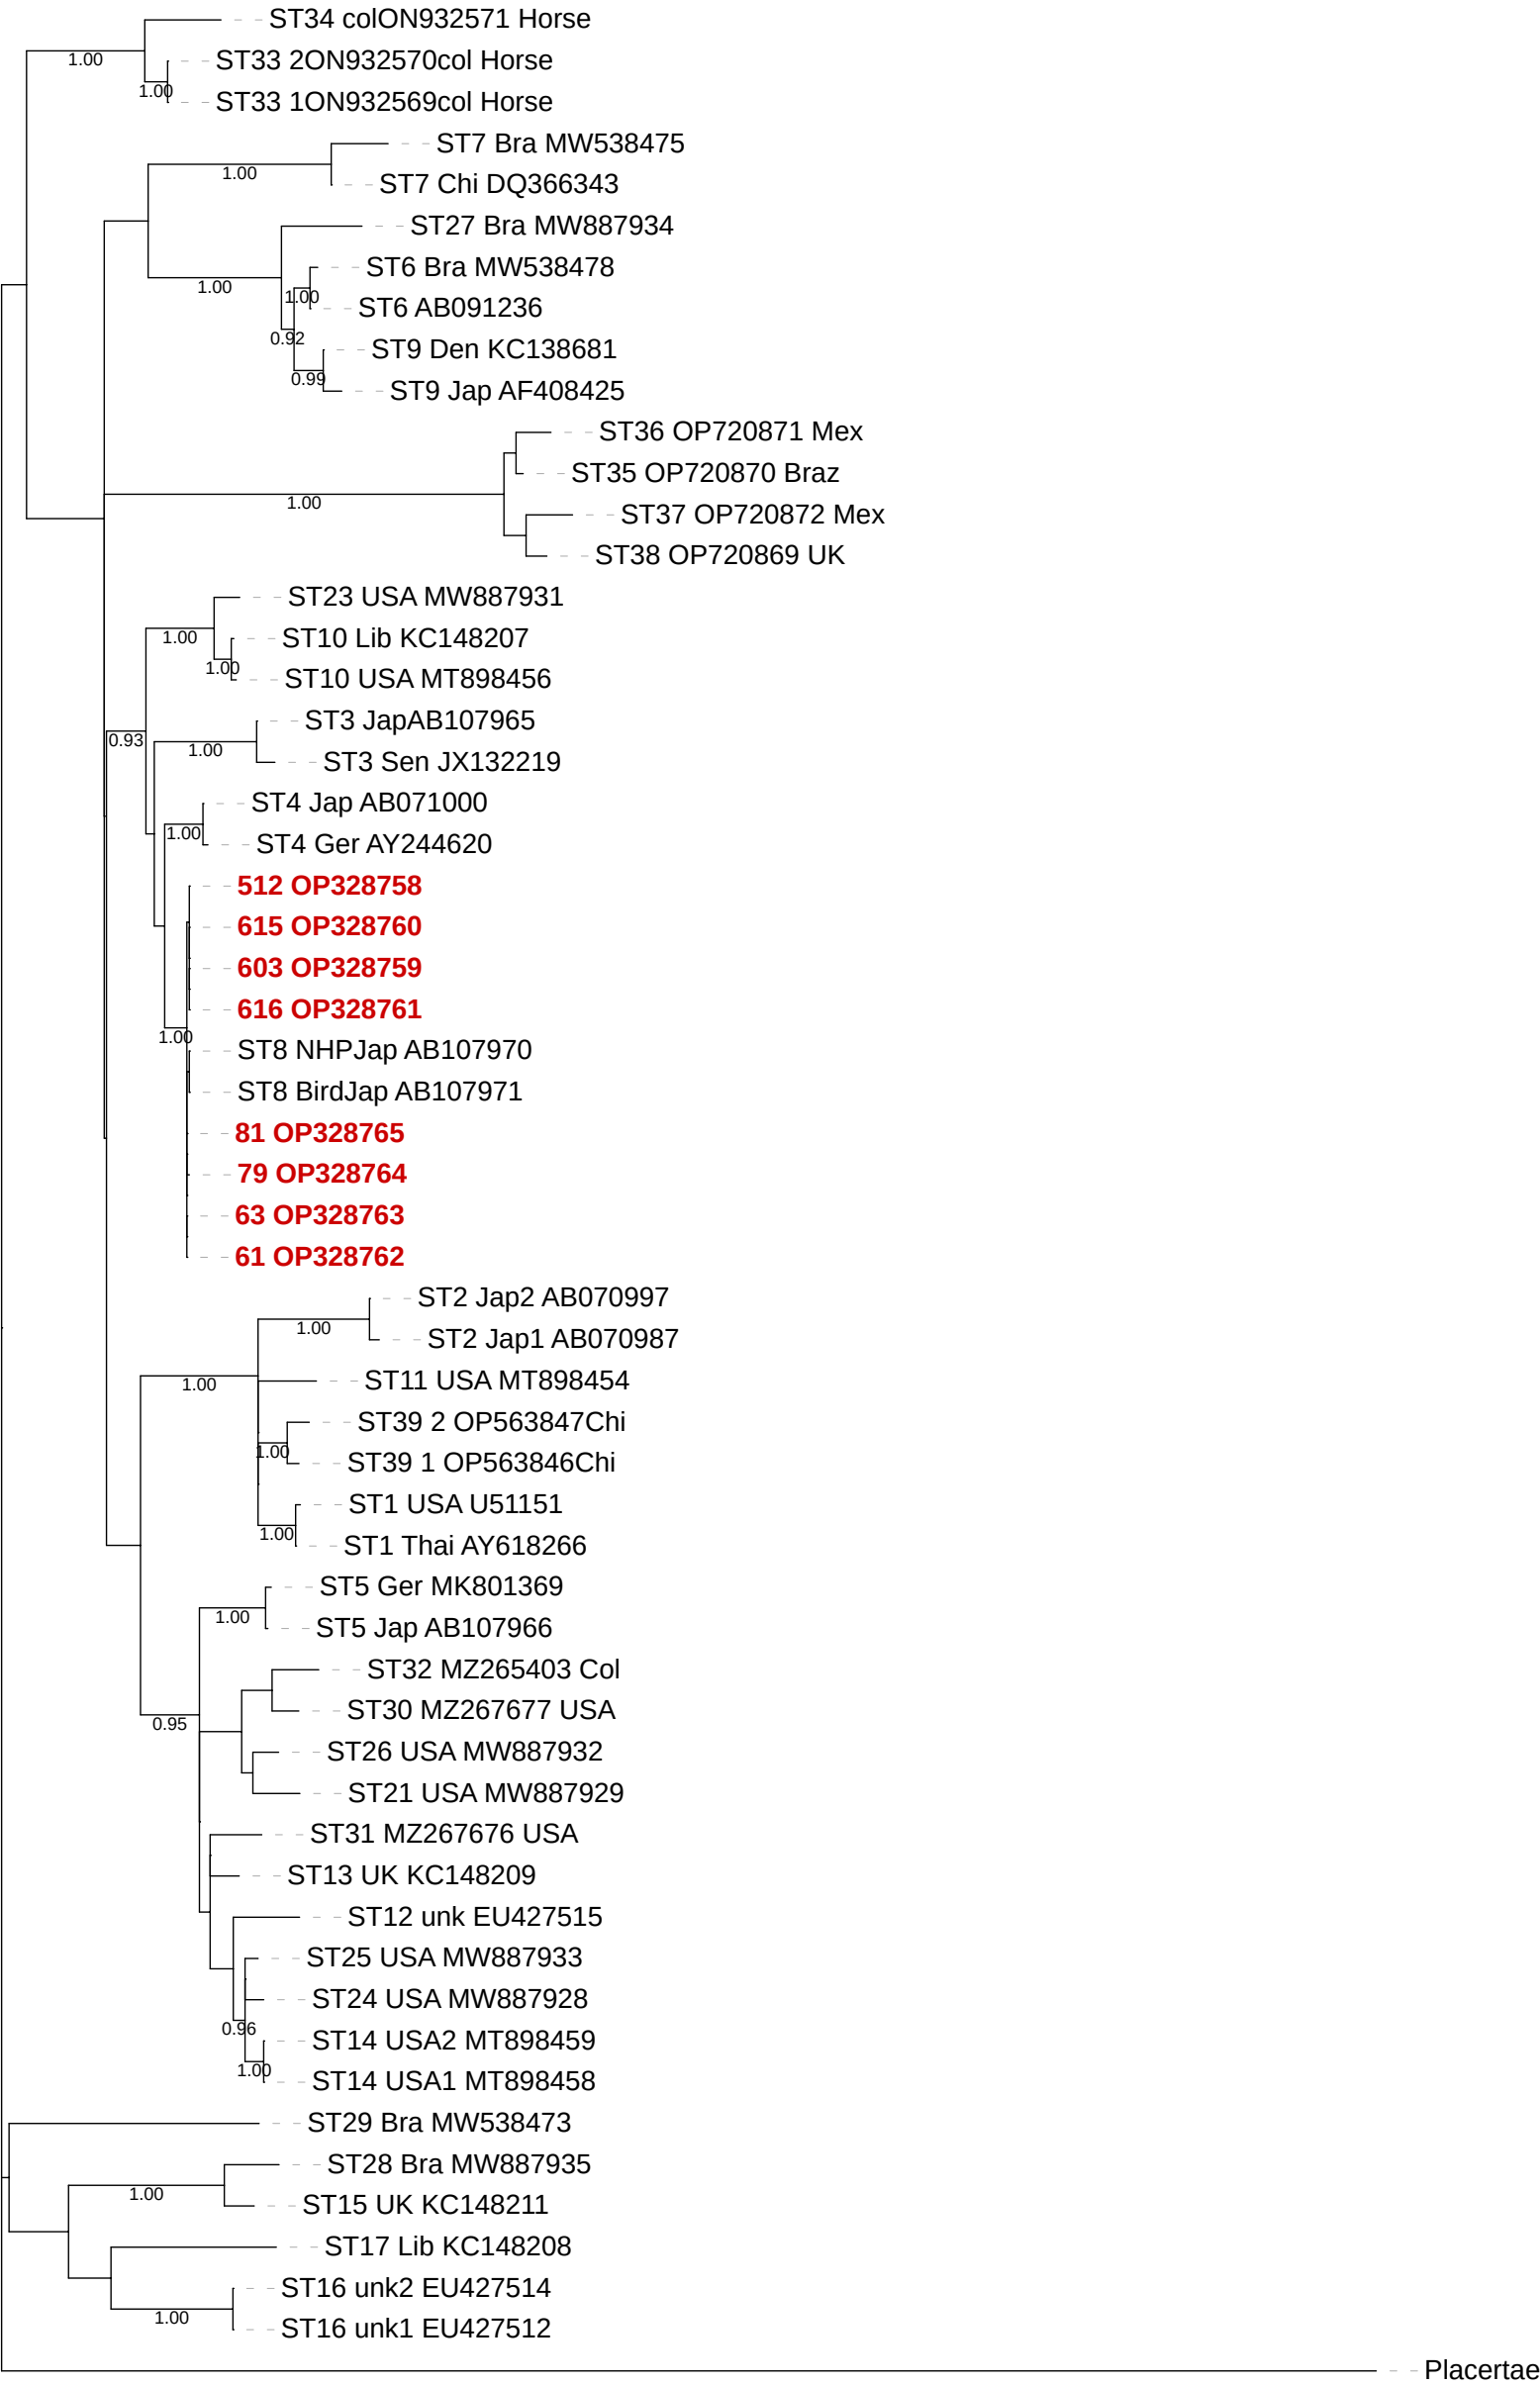

Supplement: s1 [file s1]

Tree scale: 0.1

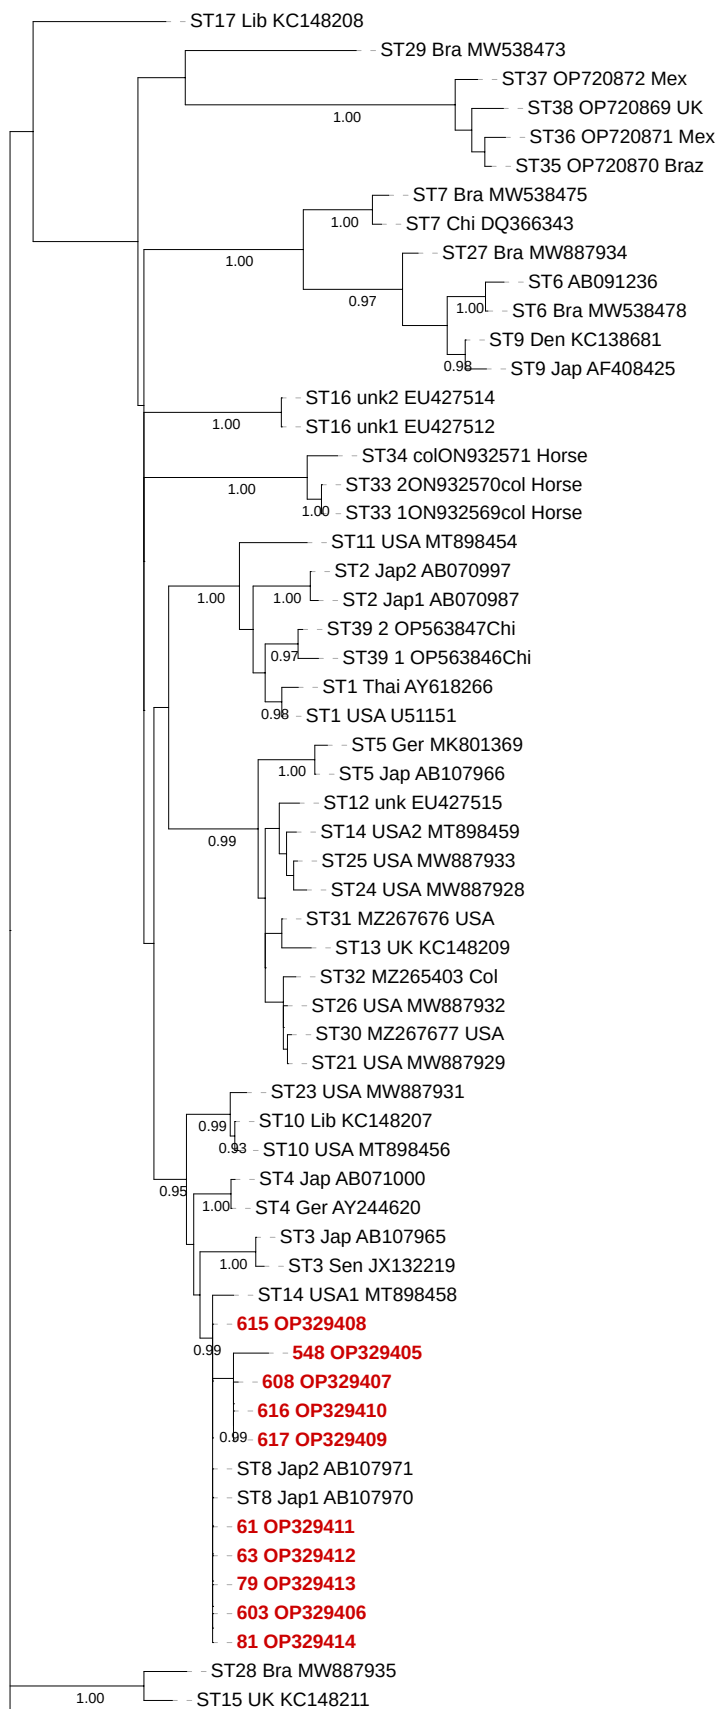

Supplement: s1 [file s1]
